# Supplementary material for: Continuous Flow-Constructed Wetlands for the Treatment of Swine Waste Water
Source: MDPI journal article supplement (doi:10.3390/ijerph15071369), 2018-06-29
Supplement: s1 [file s1]

Material:

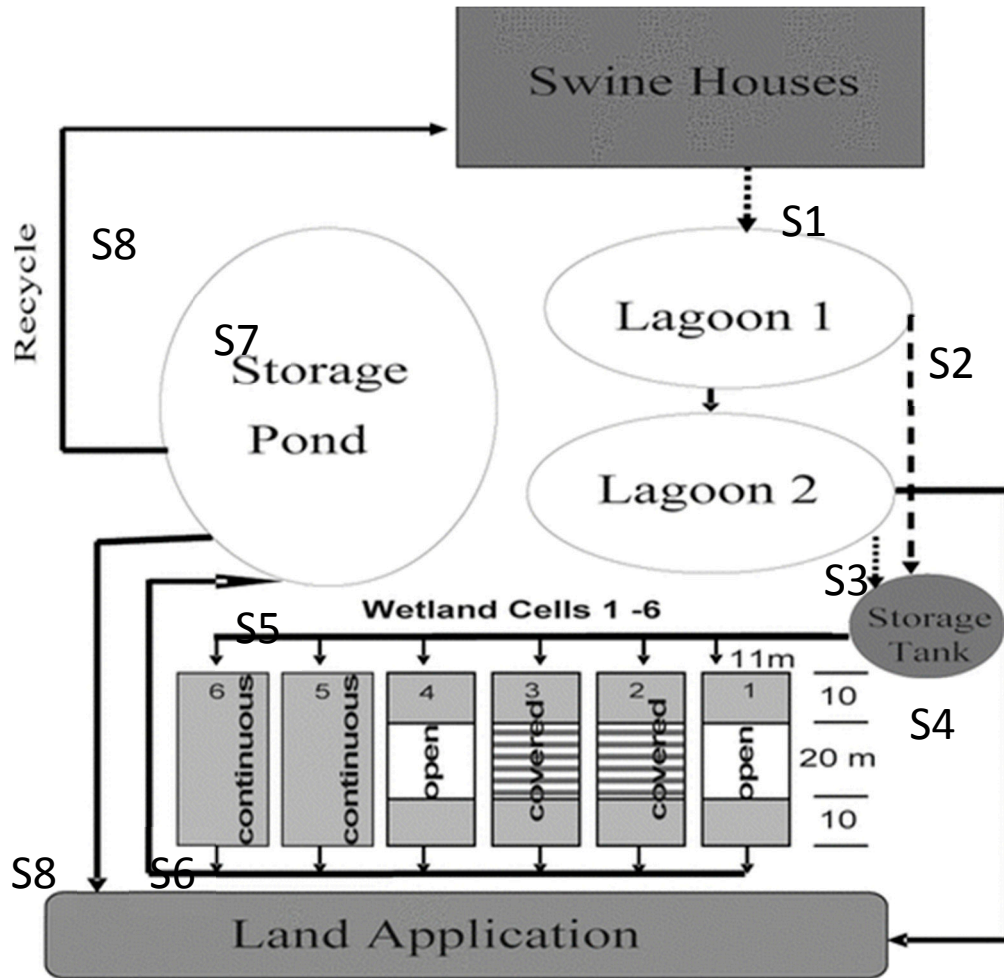

**Figure S1.** Constructed wetland located at a swine research facility at North Carolina Agricultural and Technical State University farm in Greensboro, NC, USA. S1 indicates effluent from the from the swine house into a two-stage anaerobic lagoon system consisting of a primary lagoon 1 (S2) with overflow into a secondary lagoon 2 (S3) that flows to the storage tank (S4). Wastewater flows from the 8000 L storage tank by gravity to each continuous wetland cell influent for sampling point S5. The final effluent samples (S6) from the continuous marsh cells are discharged into a storage pond (S7) and recycled for flushing of the swine production facility and for land application (S8).
